# Supplementary material for: Eroded telomeres are rearranged in quiescent fission yeast cells through duplications of subtelomeric sequences
Source: PubMed Central journal article supplement (PMC5700057; doi:10.1038/s41467-017-01894-6), 2017-11-22
Supplement: 41467_2017_1894_MOESM1_ESM.pdf [file 41467_2017_1894_MOESM1_ESM.pdf]

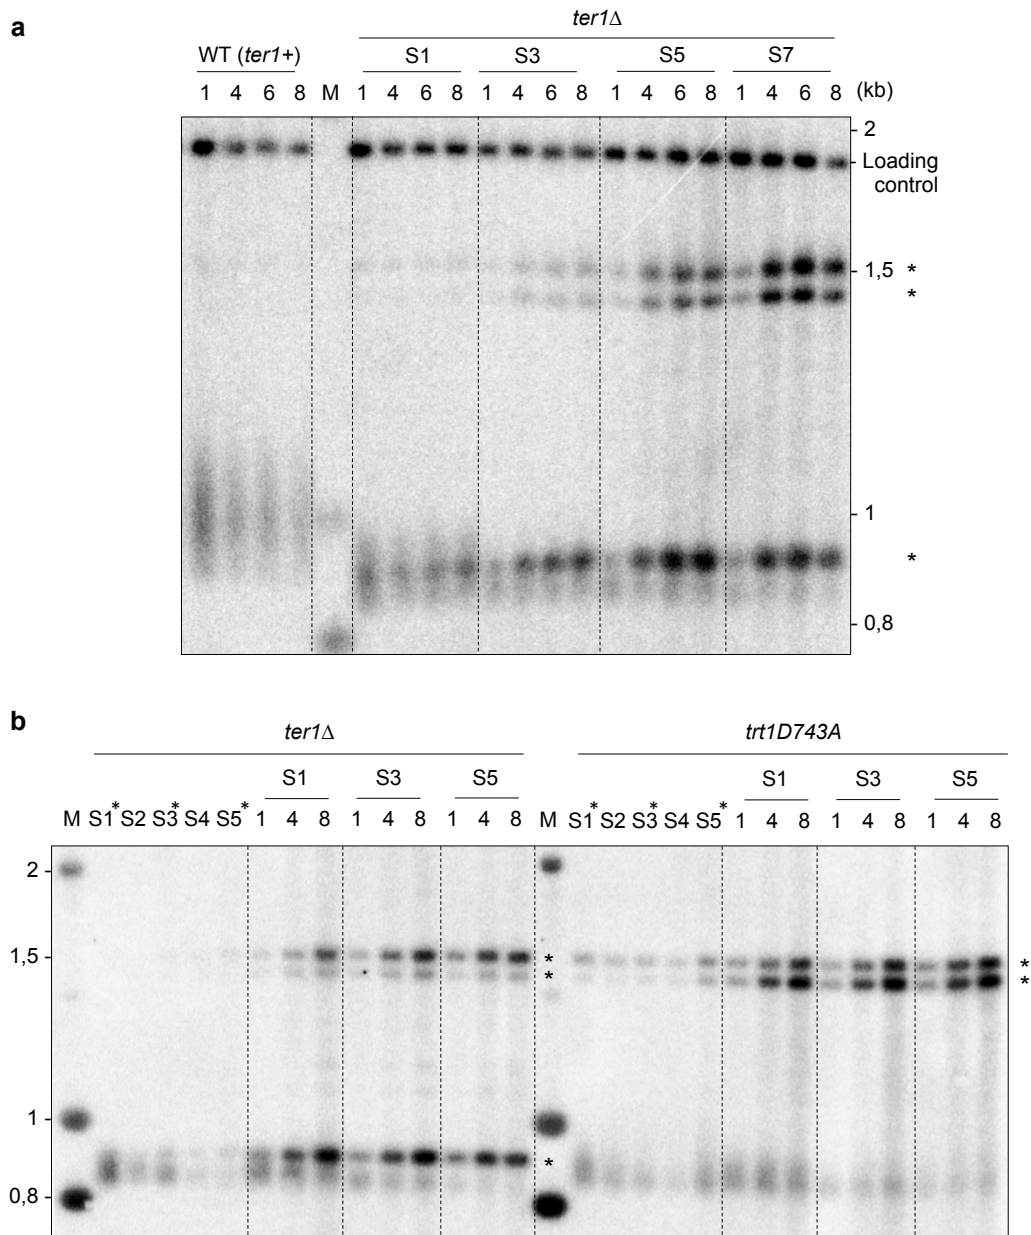

**Supplementary Figure 1. Eroded telomeres are rearranged in quiescence.**

**a)** Genomic DNA from quiescent *ter1+* and *ter1D* cells was digested by *EcoRI* and analyzed by Southern blot with Telo/STE1 and chromosomal probes. 1, 4, 6, and 8 correspond to the number of days in G0 before harvesting. For *ter1Δ* cells, S1, S3, S5 and S7 indicate the number of days in senescence before cells were starved from nitrogen. STEEx are shown by asterisks

**b)** A senescence kinetics was performed from a strain expressing a catalytically dead version of the telomerase (*trt1<sup>D743A</sup>*) after the loss of a plasmid bearing *trt1+*. At days 1, 3 and 5 of senescence, *trt1<sup>D743A</sup>* cells were starved from nitrogen and kept for 8 days in quiescence. Cells were collected at different time points of the senescence kinetics (S1-S5) and for S1, S3, and S5 cells were starved from nitrogen and collected after 1, 4, and 8 days in quiescence. A *ter1D* strain was used as control. Genomic DNA was extracted, digested with *EcoRI* and analyzed by Southern blot with the STE1/Telo probe. STEEx was detected in the *trt1<sup>D743A</sup>* strain according to its *NsiI* pattern (Supplementary Figure 3) and are shown by asterisks



>pNSU70

TCAGATGCATAAAAAATTTGAAGTTGGTATGTATTGAGTGTGTTGGAGTACGGTAAGTATAATAGGGCTAAATAA  
*NsiI*  
AATGGGTAAAAAAATTTTGAATGTGTGGAACTTGAGTATGTTGGAGTACATTAAGTAGATTACAGTTGTGGAG  
*pNsiI Fw*  
CGTACTATGGTAATGAAAATGAATGAAGAAAATGAAGTTGGGTGAATTGAGCGTGGTAGGATTCATTATGTATG  
ATTAGGAGATATAATGAGATATGGTGAATAAAAAAGTTGAAATGGTGGGCTTGAGTGCCTTAGGGTGCCTAGTAAGT  
*pNsiI Rev*  
AGAATAAAGGGGCGCAGTGTATTATGATAATTAAAAATGGATGAAAAATTTGAAGTTCAGTCACTCAGTCATAATTAATT  
*pApaI Fw*  
GGGTAACGGAGTAACAATATAGAATAAAGGGAATTTAGGAAGTCCGGTAAGTTGAATAAAGAAAATAGAAATGAAA  
**HRS**  
TACGGTATTCATAAAAAATAAATTTACTTAAAGTTTTTTTTTCACAAATACAATGCCCCACATATTGGGCCCCACC  
*ApaI*  
CGTCAGCCGAGCCGTACGGCGAGTATTCGTTAAACGATTTTGGAGAGAGAGAATGGATAATGGATGGAGGTAAGA  
*pApaI Rev*  
GAGGTATGAAAGAGTAGAAGATATAGAAGAGAAGAGAGAAGAAAATGAGGAAGAAGTAAGATGAATAGAATAGAAG  
AAACAGACTAAGGAGAGTAAATAAATAAAGTAAGAGAGTAAAAGAAAATAAGTAACTAAGAGGAAAGAAGATAAA  
*AGCAGAGGACTATATTGGAGTAGATTAAGTAGATTACAGTTGTGCAGCGTAGTATGATAATGAAGATAAAGAAA*  
*pSwaI Fw*  
ATAATTAAGCTGCGTTATTTATAAAAAATTTAAATTTACTTAAAGTTTTTTTTCACATATAACAATGCCCCACTACTG  
*SwaI*  
GACCCCAACCGTCAGCCGAGCCGTAAGCGGAGTATTCGTTAAACGTTTTTAGAGAGAGAGAAGGAAATGAAGGA  
*pSwaI Rev*  
GAGAAGGAAAATGAAGGAGAGAAGGAAAATGAAGGAGGAGAATAGGTAGAGTAGGTAGGTAGAGTAGGTAGAGTAGG  
TAGAGAGTAGGTAGGATAGAGTATGGAAGAAAAGAGGAAGAAAAGTAATGGAATAGAATAAATAGAATAGAATA  
AATAGAATAGAATAAATAGAATAAATAGAATAAATAAATAAAGAGTAAAAGAAAAGAAGATGAATGGATTAAA  
AGGTGTTGGAGTAGATTAAGTAGAATACGAGGATGTAGGGTAGTGAATAGTGAAGATGGACAAAAAGTTGAAGT  
TCATGGAATTAGACTATGTTGGAATTCACATAATTGTAATAAGGTGGTGTAGTGTGTATGGGTGAATAAAACGGAT  
*EcoRI*  
GAAAAATTTGAAGTTGATTGAACTGAGTGTGTTAAAGTTCATTAAGTATAATACGGTGATGTAGTGTACTATAG  
TATTTAGGATGGGTAAAAAATTTGAAATGTGTGGAATTTGAGTGTGCTGGAGTACGTTAAGTATAATACGGTGAGGT  
AGTGTACTATAAATAATTAGGATGGTTAAAAAATTTGAAGTTGTATGAATTTGAGTGTGTTAGAGTTCATTAAGTAT  
AATACGGTGATGTAGTGTACTATAGTATTTAGGATAGGTAAAAAATTTGAAGTTGTATGAATTTGAGTGTGTTAGA  
GTTTCATTAAGTATAATACGGTGAGGTAGTGTACTATAGTATTTAGGATGGGAAAAAATTTGAAGTTGTATGAAT  
GAGTGTGTTAGAGTTCATTAAGTATAATACGGTGAGGTAGTGTACTATAGTATTTAGGATGGGAAAAAATTTGAAA  
TGTGTGGAATTTAGTATGTTGAAATTCACATAAGTGTAAATACAGTAGTGAGTGTATTATGATAATTAAAAATGGAT  
*pApaI Fw*  
GAAAAATTTGAAGTTCAGTCACTCAGTCATAATTAATTTGGGTAACGGAGTAACAATATAGAATAAAGGGAATTTAGGAA  
**TERRA TSS** **HRS**  
GTGCGGTAAGTTGAATAAAGAAAATAGAAATGAAATACGGTATTCATAAAAAATAAATTTACTTAAAGTTTTTTTT  
CACAAATACAATGCCCCACATATTGGGCCCCACCCGTCAGCCGAGCCGTAAGGCGAGGCTGCGGGTTACAAGGTT  
*ApaI* *pApaI Rev*  
ACGTGTTACACGGTTACAGGTTACAGGGGGTTACGGTTACAGGGGTTACAGGGGTTACAGGGGTTACGGTTACAG  
GGTTACAGGTTACACGGTTACAGTTTACGGTTACAGGGTTACAGGGTTACAGGGTTACAGGGGTTACGGTTACAC  
GGTTACAGGGGTTACAGGTTACAGGGGTTACAGGTTACAGGGGTTACAGGGGTTACAGGGGTTACAGGGGGGTT  
ACGGTTACAGGGGTTACAGG

Supplementary Figure 2. Subtelomeric region sequences of pNSU70 and pNSU64.

The homologous repeated sequence (HRS, grey box), colored oligonucleotides used for RT-qPCR, and restriction sites are annotated in subtelomeric sequences of pNSU64 and pNSU70.

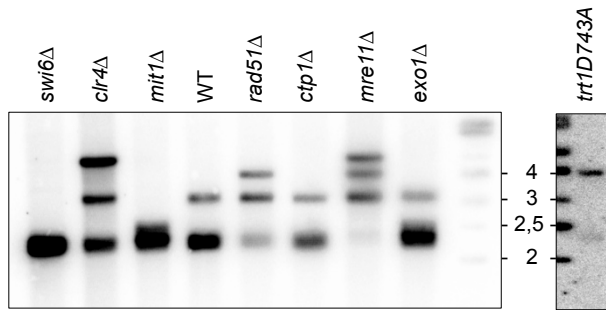

**Supplementary Figure 3. Subtelomeric patterns of strains used in this study.**

Genomic DNA of the indicated strains was digested by *Nsi*I and analyzed by Southern blot with a STE1 probe.

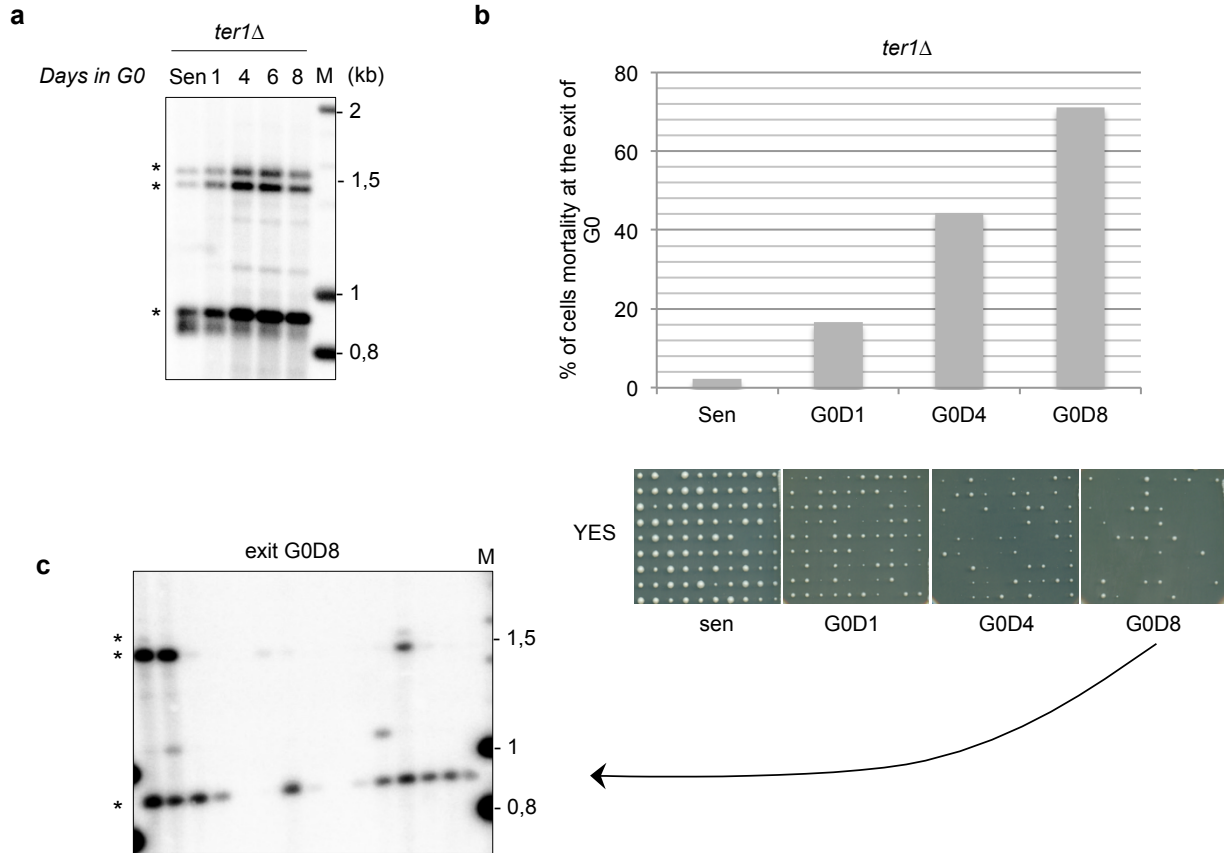

**Supplementary Figure 4. Cell viability at G0 exit.**

**a)** *EcoRI*-digested genomic DNAs from senescent and nitrogen-starved *ter1D* cells were analyzed by Southern blot.

**b)** Senescent (Sen) and quiescent *ter1D* cells after 1, 4, or 8 days in G0 were micromanipulated and plated onto YES plate. The percentage of cells that were not able to form a colony was plotted. Pictures of agar plates are shown

**c)** Fifteen clones that were able to exit G0 after 8 days of quiescence were grown for approximately 32 pds. Their genomic DNA was then extracted, digested by *EcoRI* and analyzed by Southern blot with a Telo/STE1 probe. STEEx are shown by asterisks.
